# Supplementary material for: Development of the Self Optimising Kohonen Index Network (SKiNET) for Raman Spectroscopy Based Detection of Anatomical Eye Tissue
Source: PubMed Central journal article supplement (PMC6658481; doi:10.1038/s41598-019-47205-5), 2019-07-25
Supplement: 41598_2019_47205_MOESM1_ESM.pdf [file 41598_2019_47205_MOESM1_ESM.pdf]

# Development of the Self Optimising Kohonen Index Network (SKiNET) for Raman Spectroscopy Based Detection of Anatomical Eye Tissue

Carl Banbury<sup>1</sup>   Richard Mason<sup>2</sup>   Iain Styles<sup>3</sup>   Neil Eisenstein<sup>1</sup>  
Michael Clancy<sup>1</sup>   Antonio Belli<sup>4</sup>   Ann Logan<sup>4</sup>

†Pola Goldberg Oppenheimer<sup>1</sup>

<sup>1</sup>*Chemical Engineering, University of Birmingham* <sup>2</sup>*Physics and Astronomy, University of Birmingham*

<sup>3</sup>*Computer Science, University of Birmingham* <sup>4</sup>*Institute of Inflammation and Ageing, University of Birmingham*

## Supplementary Information

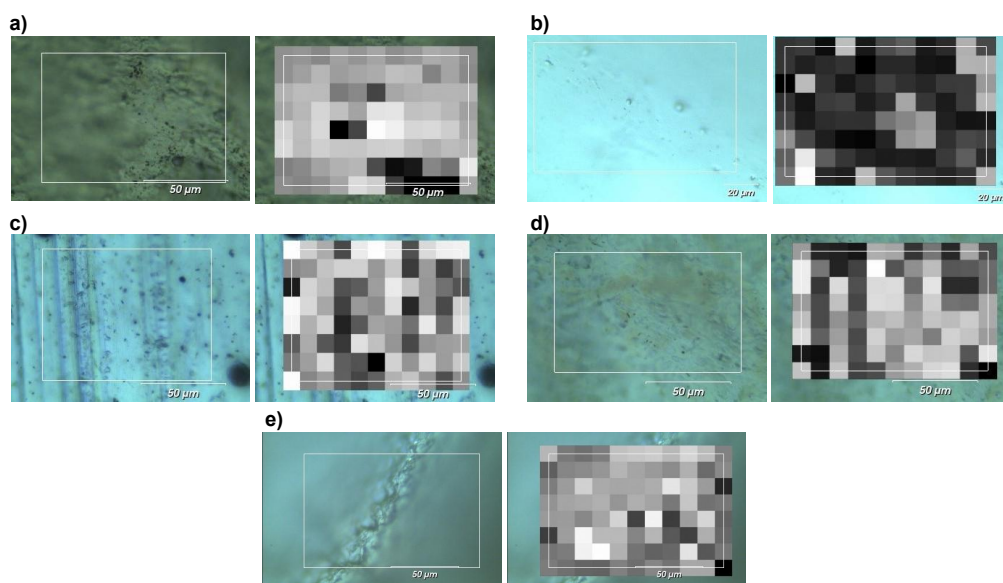

Figure S1: Paired examples of bright field optical microscope images (left) and PCA scores across map scan (right) for each tissue type: **a**, cornea, **b**, lens, **c**, vitreous humour, **d**, retina and **e**, optic nerve.

a)

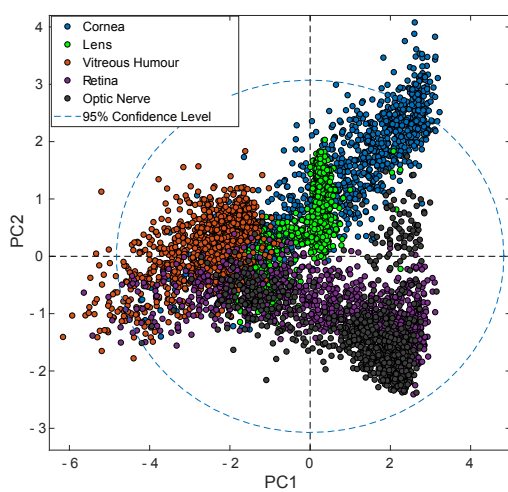

b)

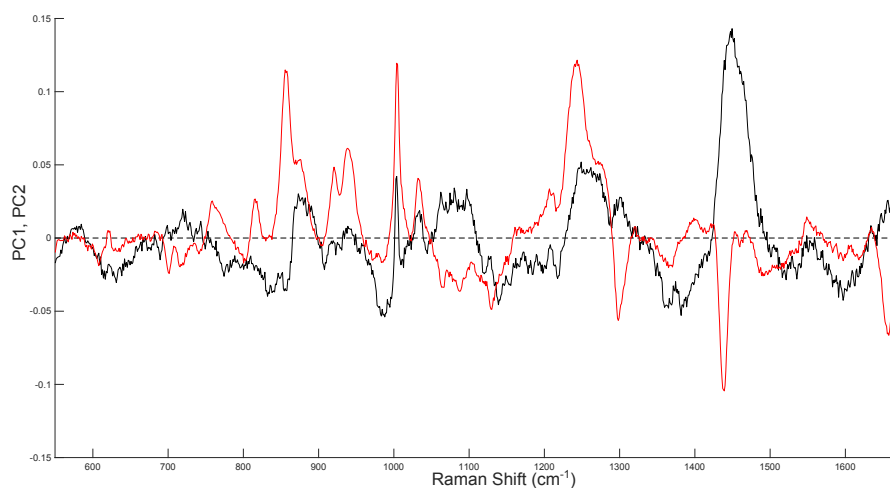

Figure S2: **a**, Scores plot for the first two principal components showing poor spatial separation of classes. **b**, Loadings for PC1 and PC2.

|                 | Cornea | Lens | Vitreous Humour | Retina | Optic Nerve |
|-----------------|--------|------|-----------------|--------|-------------|
| Cornea          | 88.0   | 2.1  | 4.7             | 3.3    | 2.8         |
| Lens            | 0.5    | 99.8 | 0.5             | 0      | 0.1         |
| Vitreous Humour | 1.0    | 0.1  | 96.5            | 2.7    | 0.5         |
| Retina          | 1.0    | 0.2  | 2.3             | 95.7   | 1.7         |
| Optic Nerve     | 4.6    | 0.71 | 0.8             | 2.2    | 92.5        |

Table S1: Confusion matrix showing average percentage for each class from the 1210 test spectra.

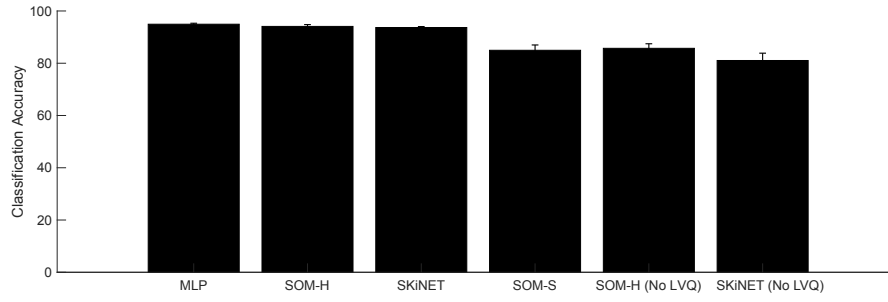

Figure S3: Comparison of classification accuracy for different approaches to SOM based classification. SOM-H refers to using the hit count for class identification, SOM-S uses supervised SOMs as described here [16]
